# Supplementary material
Source: Royal Society of Chemistry journal article supplement (doi:10.1039/d6tb00549g)
Supplement: d6tb00549g1.pdf [file d6tb00549g1.pdf]

## Supporting information

### **A Hybrid Membrane-Biomimetic Nanoplatfom for Synergistic Photothermal/Photodynamic Therapy of Hypoxic Tumors**

Wei Chen,<sup>a,b</sup> Jingchao Li,<sup>c</sup> Haiyan Li,<sup>d</sup> Yifang Liu<sup>e</sup>, Xia Lu<sup>\*a</sup>

<sup>a</sup> Department of Nuclear Medicine, Northern Jiangsu People's Hospital, Clinical Medical College, Yangzhou University, Yangzhou 225001, China. Email: lxgf2222@163.com

<sup>b</sup> Northern Jiangsu People's Hospital, Yangzhou Clinical College, Xuzhou Medical University, Yangzhou 225001, China. Email: cw18010851397@163.com

<sup>c</sup> State Key Laboratory of Advanced Fiber Materials, College of Biological Science and Medical Engineering, Donghua University, Shanghai 201620, China. Email: jcli@dhu.edu.cn

<sup>d</sup> Department of Nuclear Medicine, Northern Jiangsu People's Hospital, Yangzhou 225001, China. Email: 18951352522@163.com

<sup>e</sup> Department of Clinical Pharmacology, School of Pharmacy, China Medical University, Shenyang 110122, China. Email: m13849922723@163.com

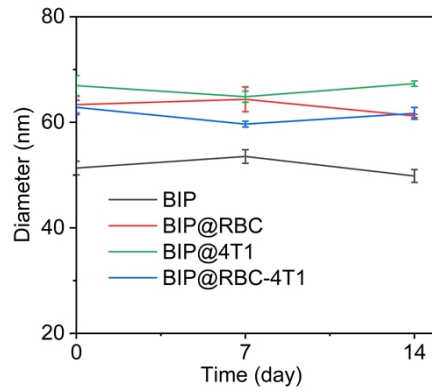

**Figure S1.** Changes in the hydrodynamic particle size of BIP, BIP@RBC, and BIP@4T1 BIP@RBC-4T1 monitored over 14 days (n = 3).

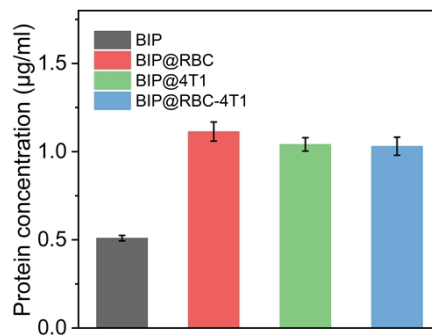

**Figure S2.** Detection of protein contents in SPFeN, SPFeNC, SPFeNO, and SPFeNOC using BCA kit. (n = 3).

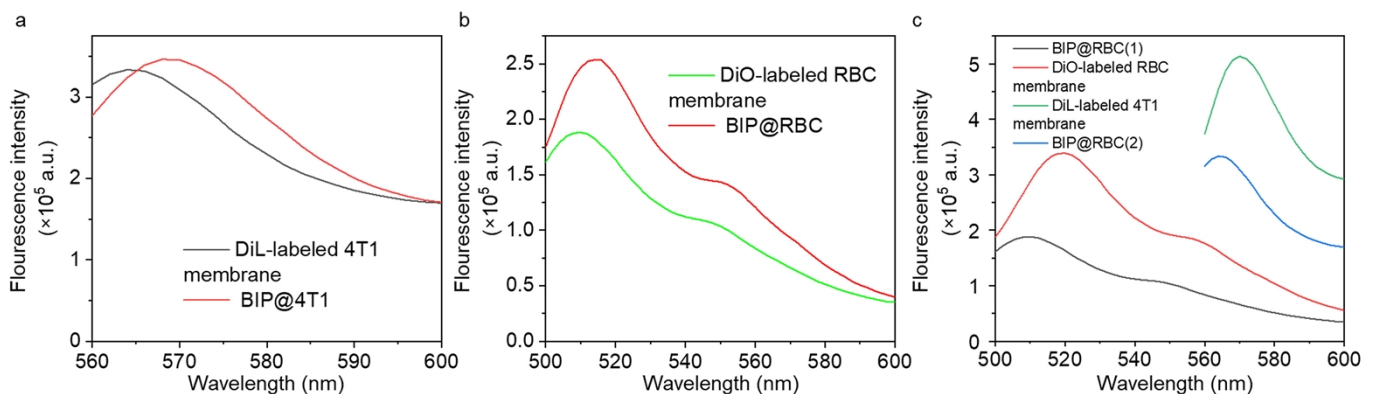

**Figure S3.** (a) Fluorescence spectra of DiL-labeled 4T1 cancer cell membranes and BIP@4T1. (b) Fluorescence spectra of DiO-labeled osteoclast membranes and BIP@RBC. (c) Fluorescence spectra of DiL-labeled 4T1 cancer cell membranes, DiO-labeled red blood cell membranes, BIP@RBC-4T1(1) excited by 484 nm light, and BIP@RBC-4T1(2) excited by 549 nm light.

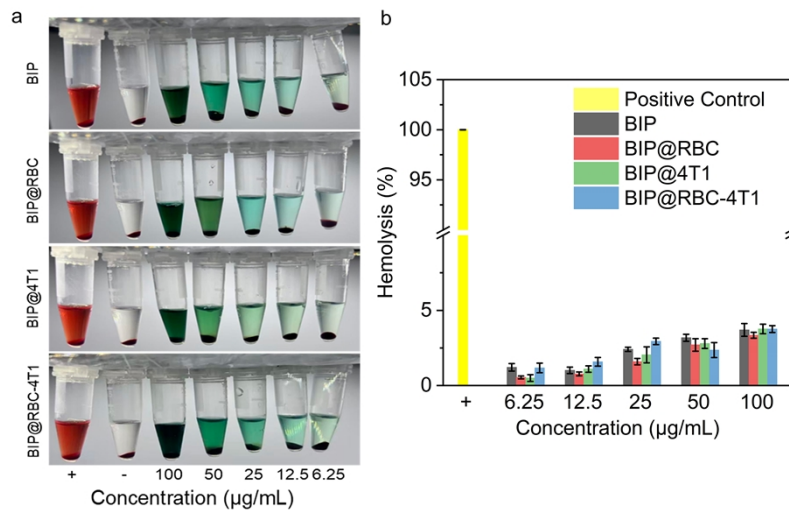

**Figure S4.** (a) Photographs of red blood cells after co-incubation with water (+), PBS (-), and different concentrations of BIP, BIP@RBC, BIP@4T1, and BIP@RBC-4T1. (b) Hemolysis rates of red blood cells after co-incubation with water (+), BIP, BIP@RBC, BIP@4T1, and BIP@RBC-4T1 (n = 3).

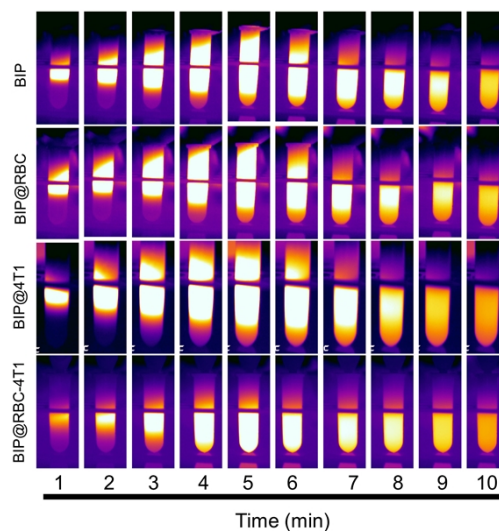

**Figure S5.** Thermal imaging diagrams of temperature rise of materials in each group within 10 minutes.

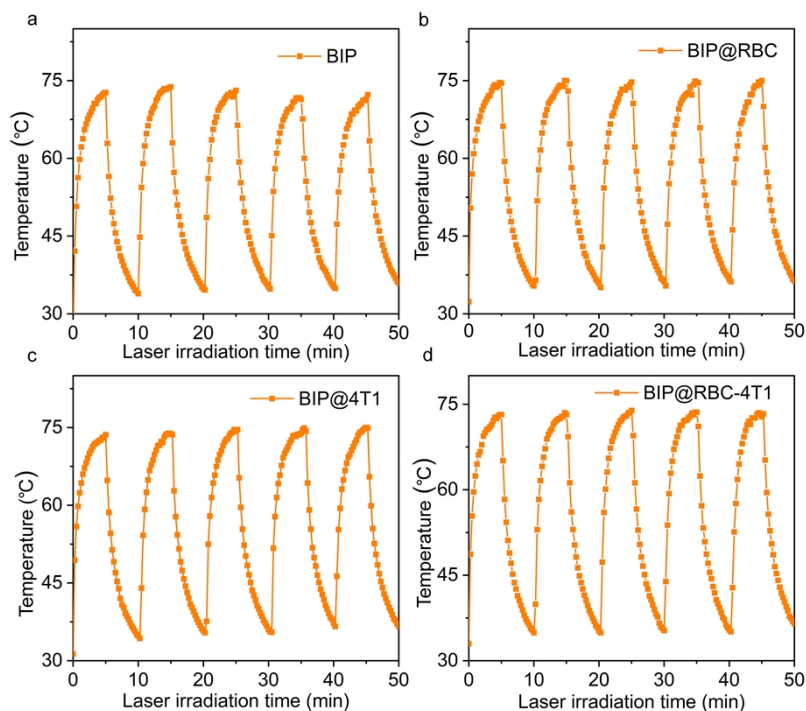

**Figure S6.** Temperature rise cycles of materials in each group for 5 times within 50 minutes (a) BIP group (b) BIP@RBC group (c) BIP@4T1 group (d) BIP@RBC-4T1 group.

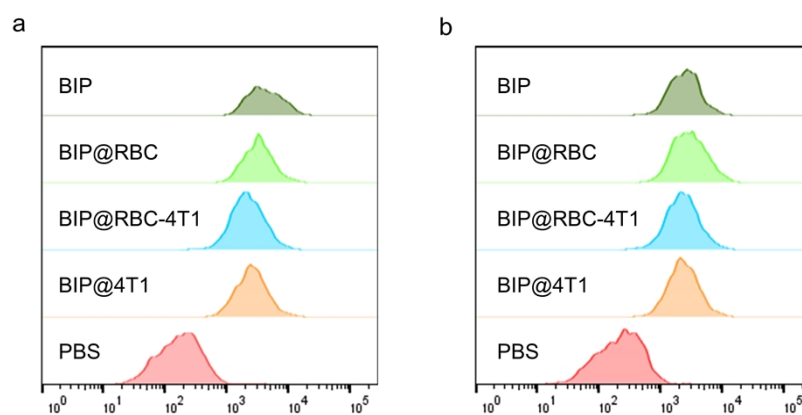

**Figure S7.** (a) Flow cytometry analysis of cellular uptake of BIP, BIP@RBC, BIP@4T1 and BIP@RBC-4T1 in HepG2 cells (n = 5). (b) Flow cytometry analysis of cellular uptake of BIP, BIP@RBC, BIP@4T1 and BIP@RBC-4T1 in HMEC cells (n = 5).

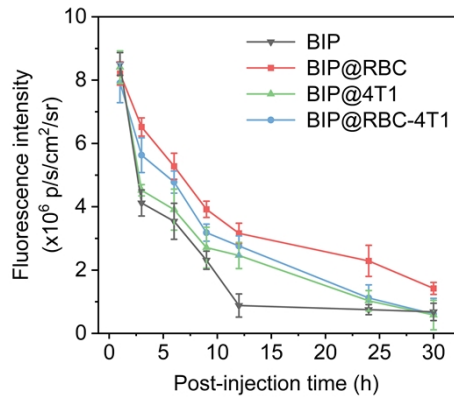

**Figure S8.** Fluorescence quantification in orbital venous blood of mice in each group at different time points.

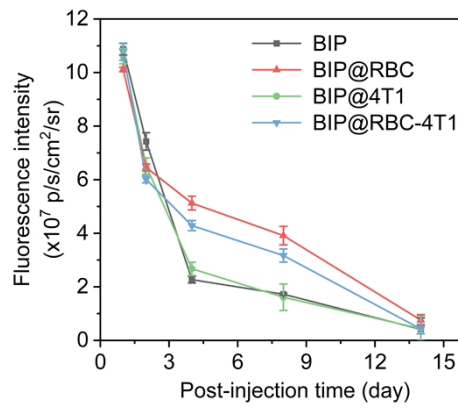

**Figure S9.** Fluorescence quantification in the feces of mice in each group at different time points.

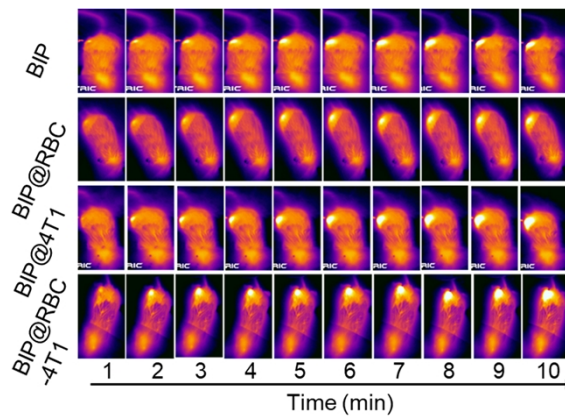

**Figure S10.** Thermal imaging maps of temperature rise in different groups of mice under 808 nm laser irradiation.

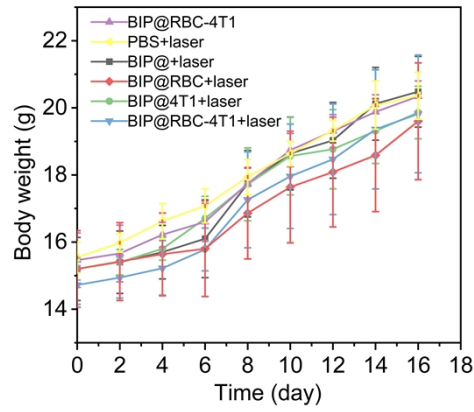

**Figure S11.** Body weight change curves of different groups of mice.

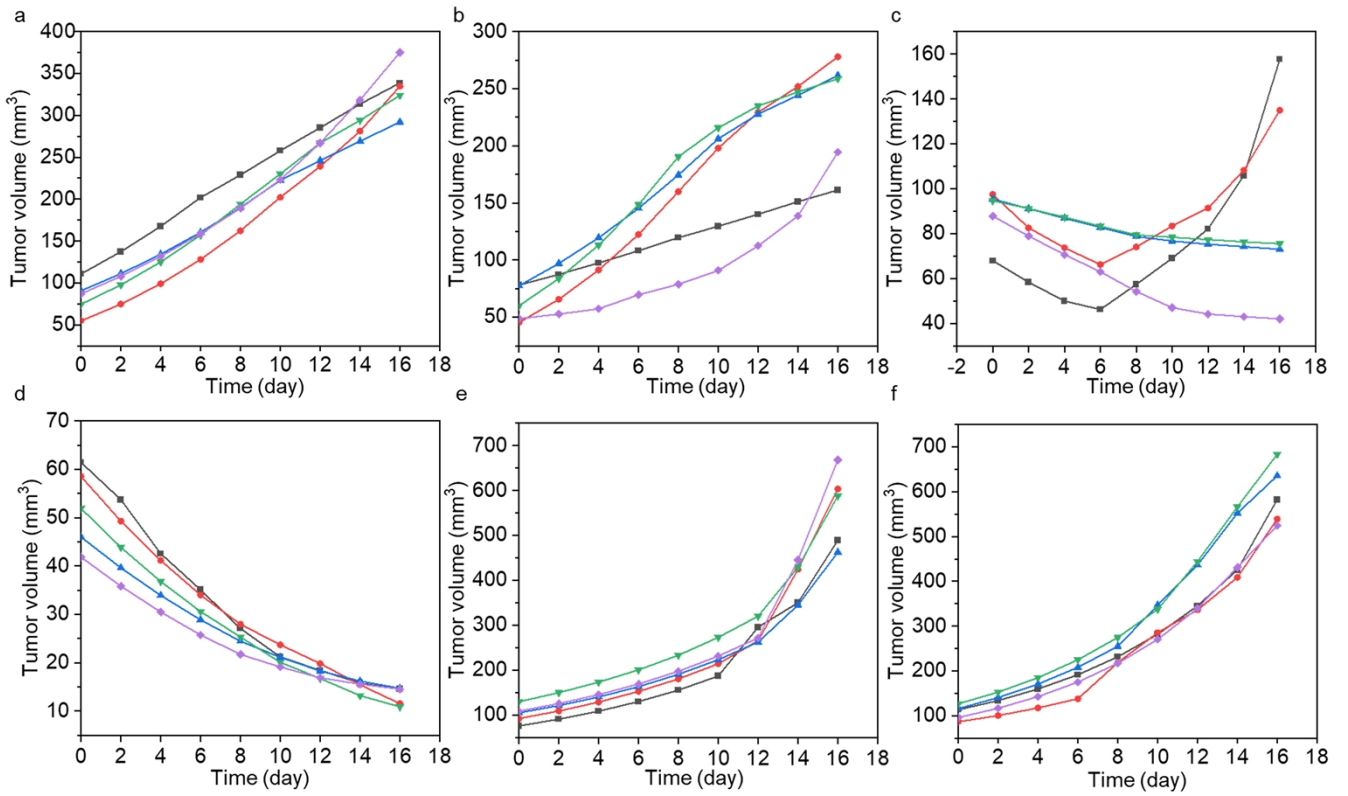

**Figure S12.** Tumor volumes of mice in each group after treatment (a) BIP + laser group (b) BIP@RBC + laser group (c) BIP@4T1 + laser group (d) BIP@RBC-4T1 + laser group (e) PBS + laser group (f) BIP@RBC-4T1 group.

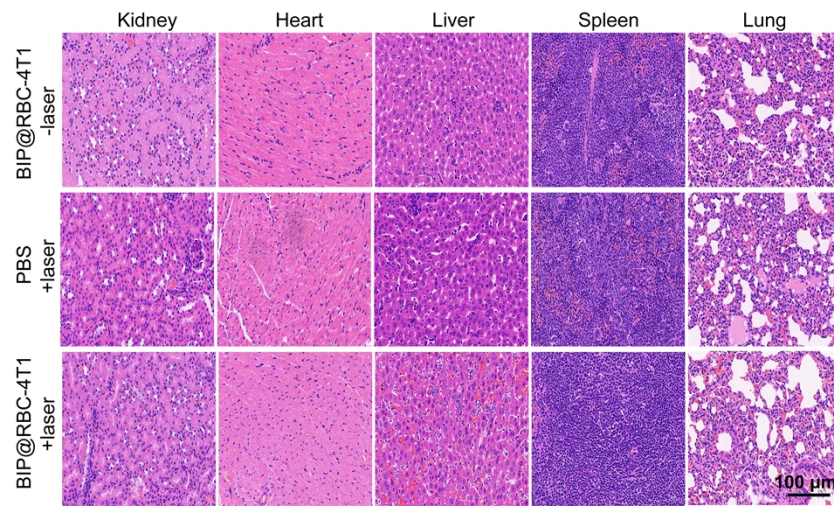

**Figure S13.** HE sections of heart, liver, spleen, lung and kidney organs of tumor-bearing mice in BIP@RBC-4T1-laser, PBS + laser, and BIP@RBC-4T1 + laser groups.

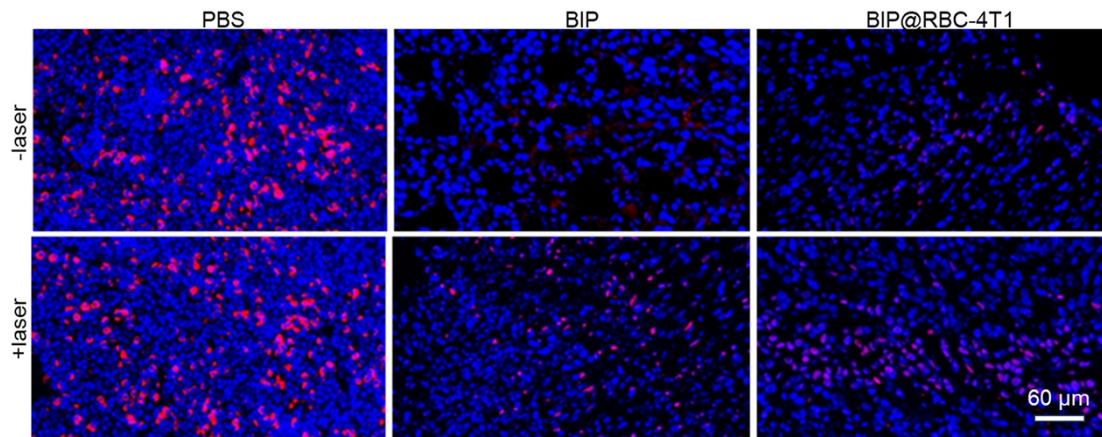

**Figure S14.** Immunofluorescence staining of HIF-1 $\alpha$  in tumor-bearing mice in the PBS, BIP and BIP@RBC-4T1 group with or without treatment.
